# Supplementary material for: Toxicity and Teratogenic Potential of Piplartine from Piper tuberculatum Jacq. during Embryonic Development in Mice (Mus musculus)
Source: MDPI journal article supplement (doi:10.3390/ddc3020021), 2024-04-30
Supplement: s1 [file s1]

## Supplementary Material

### Toxicity and teratogenic potential of pipartine from *Piper tuberculatum* Jacq. during mice (*Mus musculus*) embryonic development

#### NMR and HPLC data:

$^1\text{H}$  NMR (Varian Inova 300 MHz;  $\text{CDCl}_3$ ) and  $^{13}\text{C}$  NMR (Varian Inova 75 MHz;  $\text{CDCl}_3$ ); See reference: Fokoue, H. H.; Marques, J. V.; Correia, M. V.; Yamaguchi, L. F.; Qu, X.; Aires-de-Sousa, J.; Scotti, M. T.; Lopes, N. P.; Kato, M. J., RSC Advances **2018**, 8, 21407-21413.

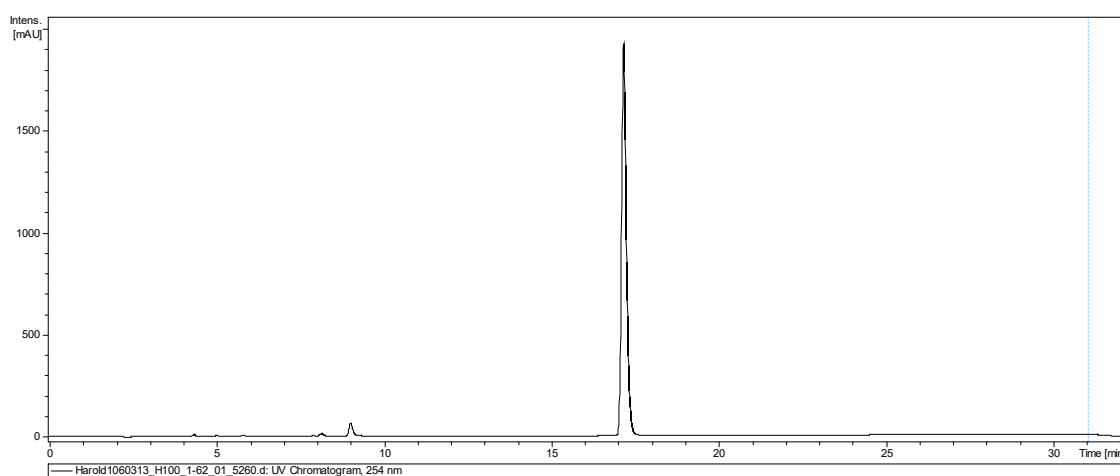

**Figure S1.** The Shimadzu liquid chromatograph (Kyoto, Japan) consisted of two analytical pumps model LC-20AD, automatic injector SIL-20AHT, UV/Vis detector SPD-20A, column oven CTO-20A, controller CBM-20A. Luna 5 $\mu\text{m}$  PFP(2) 100 A, 150 x 2 mm (Phenomenex). Flow, 0.2 ml/min, mobile phase A:H<sub>2</sub>O (0.1% formic acid); B: Acetonitrile (0.1% formic acid). Gradient 0 min, 20% B, hold up to 5 min, 5 to 50 min, 20 to 30% of B, kept at 100% up to 35 min. Oven temperature 40°C, detection wavelengths set at 254 and 330 nm.
